# Supplementary material
Source: HighWire-hosted journal article supplement (https://bmjopen.bmj.com/content/15/1/e086927)
Supplement: inline-supplementary-material-1 [file inline-supplementary-material-1.pdf]

## Supplementary File 1. Search Strategy

**Ovid MEDLINE: Epub Ahead of Print, In-Process & Other Non-Indexed Citations, Ovid MEDLINE® Daily and Ovid MEDLINE® <1946-Present>**

1 ("exp Health Services for Transgender Persons/" or "exp Gender Identity/" or "Gender ident\*" or "exp Transgender Persons/" or "transgender\*" or "transperson\*" or "transpeople\*" or "trans gender\*" or "exp Transsexualism/" or "trans patient" or "trans health\*" or "trans\* affirm" or "transexual\*" or "trans sexual\*" or "transman" or "transmen" or "trans man" or "trans men" or "transwoman" or "transwomen" or "trans woman" or "trans women" or "trans masc\*" or "transmasc\*" or "trans fem\*" or "transfem\*" or "gender quest\*" or "gender fluid\*" or "genderfluid\*" or "gender non-conforming" or "gender continuum" or "gender nonconforming" or "nonbinary" or "agender\*" or "bigender\*" or "intergender\*" or "inter-gender\*" or "multigender" or "multi-gender\*" or "genderqueer" or "gender queer" or "gender minority" or "gender minorities" or "gender divers\*" or "gender incongruent" or "gender change" or "trans adult\*" or "trans person\*" or "trans male\*" or "trans female\*" or "cross gender" or "crossgender" or "exp Transvestism/" or "Transvest\*" or "cross dress\*" or "two-spirit\*" or "gender affirm\*" or "exp gender Dysphoria/" or "gender dysphor\*" or "gender euphoria" or "gender identity disorder\*" or "FTM" or "MTF" or "Male to female" or "Female to male").mp. 234670

2 ("exp Pharmacy/" or "exp Pharmacist/" or "exp Students, Pharmacy/" or "exp Education, Pharmacy/" or "exp Faculty, Pharmacy/" or "Pharmacy" or "Pharmacy student\*" or "Pharmacist" or "Pharmacy curricul\*" or "Pharmacy faculty" or "Pharmacy program\*" or "Pharmacy education" or "Undergrad\* pharmacy\*" or "Bachelor of Science Pharmacy" or "BScPhm" or "Doctor of Pharmacy" or "PharmD").mp. 91118

3 1 and 2 426

**APA PsycInfo <1806 to November 2024 Week 2>**

1 ("exp Health Services for Transgender Persons/" or "exp Gender Identity/" or "Gender ident\*" or "exp Transgender Persons/" or "transgender\*" or "transperson\*" or "transpeople\*" or "trans gender\*" or "exp Transsexualism/" or "trans patient" or "trans health\*" or "trans\* affirm" or "transexual\*" or "trans sexual\*" or "transman" or "transmen" or "trans man" or "trans men" or "transwoman" or "transwomen" or "trans woman" or "trans women" or "trans masc\*" or "transmasc\*" or "trans fem\*" or "transfem\*" or "gender quest\*" or "gender fluid\*" or "genderfluid\*" or "gender non-conforming" or "gender nonconforming" or "gender continuum" or "nonbinary" or "agender\*" or "bigender\*" or "intergender\*" or "inter-gender\*" or "multigender" or "multi-gender\*" or "genderqueer" or "gender queer" or "gender minority" or "gender minorities" or "gender divers\*" or "gender incongruent" or "gender change" or "trans adult\*" or "trans person\*" or "trans male\*" or "trans female\*" or "cross gender" or "crossgender" or "exp Transvestism/" or "Transvest\*" or "cross dress\*" or "two-spirit\*" or "gender affirm\*" or "exp gender Dysphoria/" or "gender dysphor\*" or "gender euphoria" or "gender identity disorder\*" or "FTM" or "MTF" or "Male to female" or "Female to male").mp. 119511

2 ("exp Pharmacy/" or "exp Pharmacist/" or "exp Students, Pharmacy/" or "exp Education, Pharmacy/" or "exp Faculty, Pharmacy/" or "Pharmacy" or "Pharmacy student\*" or "Pharmacist" or "Pharmacy curricul\*" or "Pharmacy faculty" or "Pharmacy program\*" or "Pharmacy education" or "Undergrad\* pharmacy\*" or "Bachelor of Science Pharmacy" or "BScPhm" or "Doctor of Pharmacy" or "PharmD").mp. 6857

3 1 and 2 76

**Embase Classic+Embase <1947 to 2024 November 15>**

1 ("exp Health Services for Transgender Persons/" or "exp Gender Identity/" or "Gender ident\*" or "exp Transgender Persons/" or "transgender\*" or "transperson\*" or "transpeople\*" or "trans gender\*" or "exp Transsexualism/" or "trans patient" or "trans health\*" or "trans\* affirm" or "transexual\*" or "trans sexual\*" or "transman" or "transmen" or "trans man" or "trans men" or "transwoman" or "transwomen" or "trans woman" or "trans women" or "trans masc\*" or "transmasc\*" or "trans fem\*" or "transfem\*" or "gender quest\*" or "gender fluid\*" or "genderfluid\*" or "gender non-conforming" or "gender nonconforming" or "gender continuum" or "nonbinary" or "agender\*" or "bigender\*" or "intergender\*" or "inter-gender\*" or "multigender" or "multi-gender\*" or "genderqueer" or "gender queer" or "gender minority" or "gender minorities" or "gender divers\*" or "gender incongruent" or "gender change" or "trans adult\*" or "trans person\*" or "trans male\*" or "trans female\*" or "cross gender" or "crossgender" or "exp Transvestism/" or "Transvest\*" or "cross dress\*" or "two-spirit\*" or "gender affirm\*" or "exp gender Dysphoria/" or "gender dysphor\*" or "gender euphoria" or "gender identity disorder\*" or "FTM" or "MTF" or "Male to female" or "Female to male").mp. 345531

2 ("exp Pharmacy/" or "exp Pharmacist/" or "exp Students, Pharmacy/" or "exp Education, Pharmacy/" or "exp Faculty, Pharmacy/" or "Pharmacy" or "Pharmacy student\*" or "Pharmacist" or "Pharmacy curricul\*" or "Pharmacy faculty" or "Pharmacy program\*" or "Pharmacy education" or "Undergrad\* pharmacy\*" or "Bachelor of Science Pharmacy" or "BScPhm" or "Doctor of Pharmacy" or "PharmD").mp. 237205

3 1 and 2 1295

## Scopus

TITLE-ABS-KEY ( "transgender\*" OR "transperson\*" OR "transpeople\*" OR "trans gender\*" OR "trans patient" OR "trans health\*" OR "trans\* affirm" OR "transexual\*" OR "trans sexual\*" OR "trans man" OR "trans men" OR "trans woman" OR "trans women" OR "trans masc\*" OR "transmasc\*" OR "trans fem\*" OR "transfem\*" OR "gender quest\*" OR "gender fluid\*" OR "genderfluid\*" OR "gender non-conforming" OR "gender nonconforming" OR "gender continuum" OR "agender\*" OR "bigender\*" OR "intergender\*" OR "inter-gender\*" OR "multi-gender\*" OR "gender queer" OR "gender minority" OR "gender minorities" OR "gender divers\*" OR "gender incongruent" OR "gender change" OR "trans adult\*" OR "trans person\*" OR "trans male\*" OR "trans female\*" OR "cross gender" OR "Transvest\*" OR "cross dress\*" OR "two-spirit\*" OR "gender affirm\*" OR "exp gender Dysphoria/" OR "gender dysphor\*" OR "gender euphoria" OR "gender identity disorder\*" OR "FTM" OR "MTF" ) AND TITLE-ABS-KEY ( "Pharmacy" OR "Pharmacy student\*" OR "Pharmacist" OR "Pharmacy curricul\*" OR "Pharmacy faculty" OR "Pharmacy program\*" OR "Pharmacy education" OR "Undergrad\* pharmacy\*" )

312 articles found
